# Supplementary material for: A selective detection approach for copper(ii) ions using a hydrazone-based colorimetric sensor: spectroscopic and DFT study
Source: Royal Society of Chemistry journal article supplement (doi:10.1039/c8ra08807a), 2018-01-01
Supplement: c8ra08807a1.pdf [file c8ra08807a1.pdf]

## Supplementary Figures and Tables

### List of Figures

**Fig. S1** . Color changes observed on addition of 3-HNHBH ligand to  $\text{Mg}(\text{OAc})_2$ ,  $\text{Ca}(\text{OAc})_2$ ,  $\text{Ni}(\text{OAc})_2$ ,  $\text{Cu}(\text{OAc})_2$ ,  $\text{Zn}(\text{OAc})_2$  and  $\text{Pd}(\text{OAc})_2$  solutions

**Fig. S2** Hydrogen assignment in keto (a) and enol (b) forms of 3-HNHBH ligand

**Fig. S3** (a) EDX spectrum, and (b) EDX elemental mapping of 3-HNHBH ligand.

**Fig. S4** (a) EDX spectrum and (b) EDX elemental mapping of 3-HNHBH after complexation with Cu(II) ion.

**Fig. S5** Proposed mode of complexation of 3-HNHBH ligand and metal ions

**Fig. S6** Absorbance vs wavelength ( $\lambda$ / nm) of ligand/THF with  $\text{Cu}(\text{OAc})_2$ /THF. Some spectra omitted for clarity

**Fig. S7** Absorbance vs wavelength ( $\lambda$ / nm) of ligand/THF with increasing concentrations of Cu(II) ions. Some spectra omitted for clarity. Inset: Calibration plot of absorbance vs concentration of Cu(II) ions

**Fig. S8** Mulliken atomic charges distribution of 3-HNHBH ligand complex with Cu(II) ion as calculated at the B3LYP/6-311+G\* level. The arrows indicate potential sites for possible proton attack

## Figures

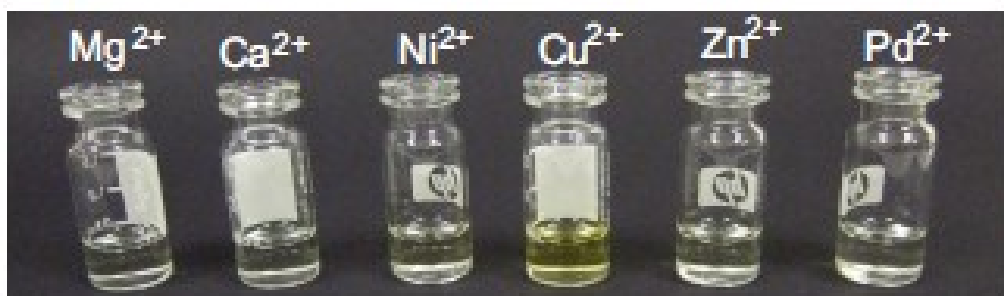

**Fig. S1** . Color changes observed on addition of 3-HNHBH ligand to Mg(OAc)<sub>2</sub>, Ca(OAc)<sub>2</sub>, Ni(OAc)<sub>2</sub>, Cu(OAc)<sub>2</sub>, Zn(OAc)<sub>2</sub> and Pd(OAc)<sub>2</sub> solutions

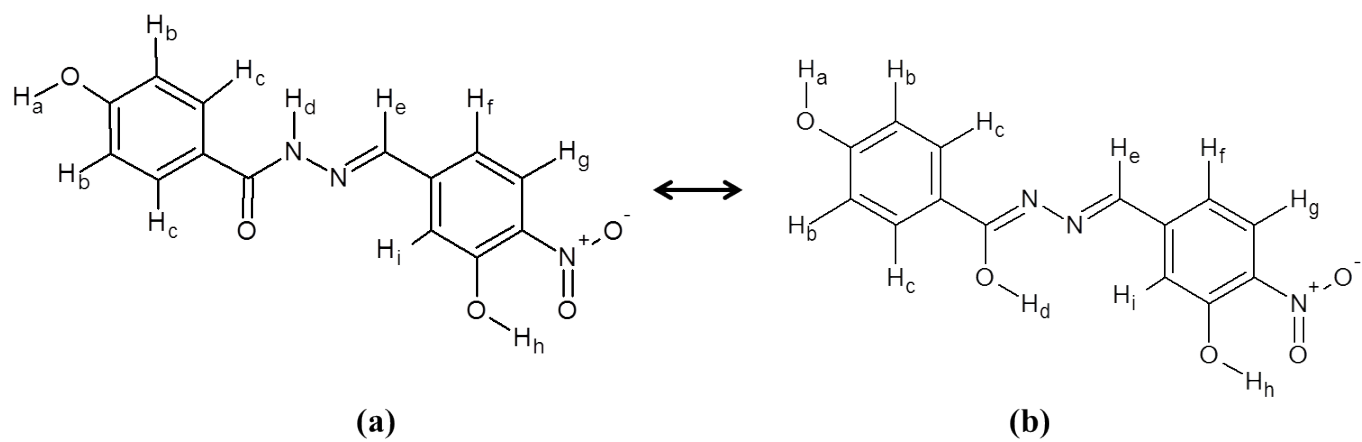

**Fig. S2** Hydrogen assignment in keto (a) and enol (b) forms of 3-HNHBH ligand

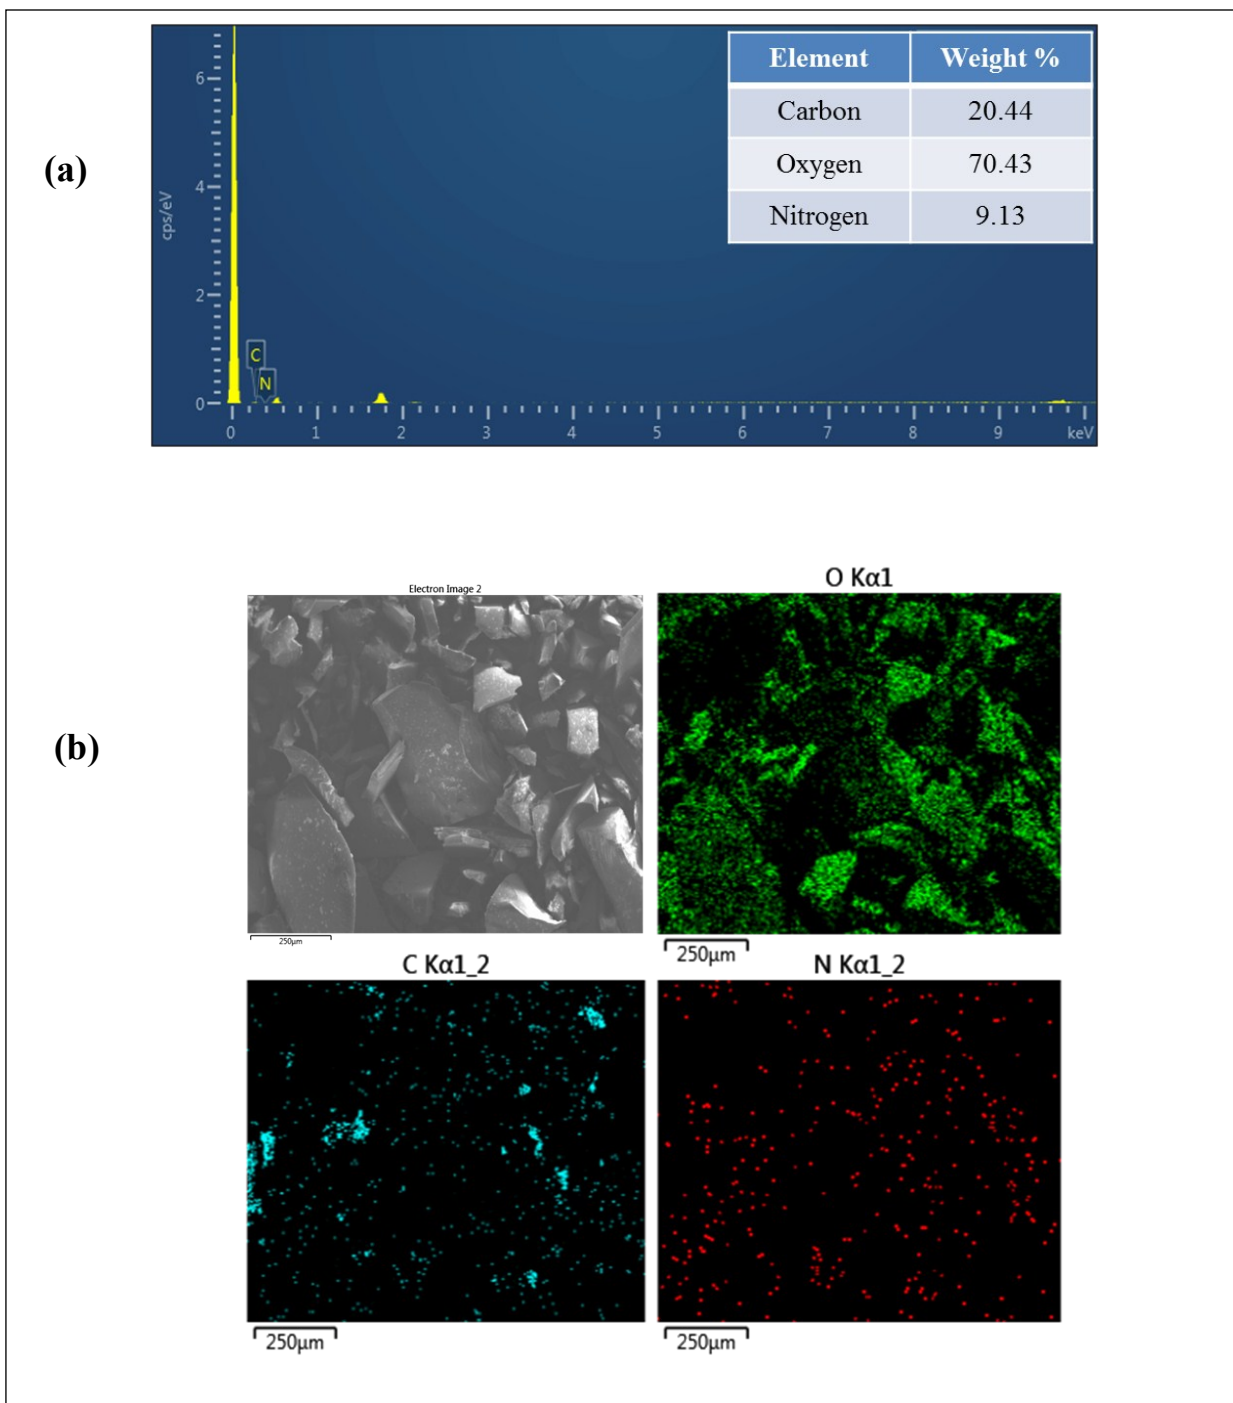

**Fig. S3** (a) EDX spectrum, and (b) EDX elemental mapping of 3-HNHBH ligand

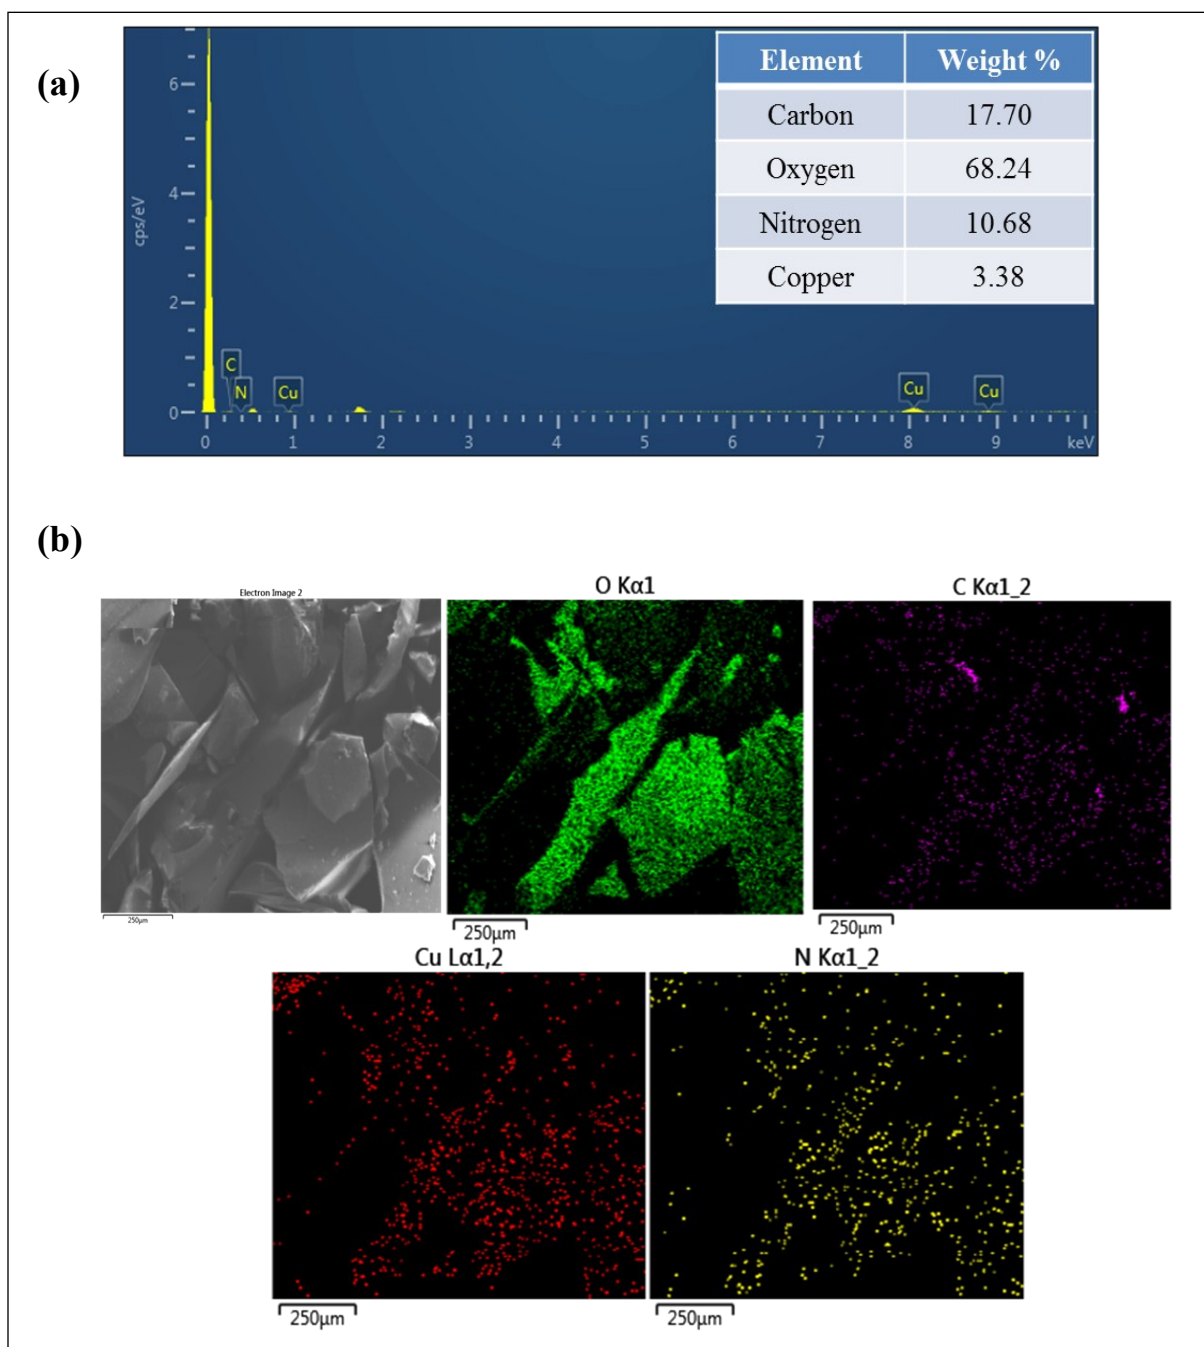

**Fig. S4** (a) EDX spectrum and (b) EDX elemental mapping of 3-HNHBH after complexation with Cu(II) ion.

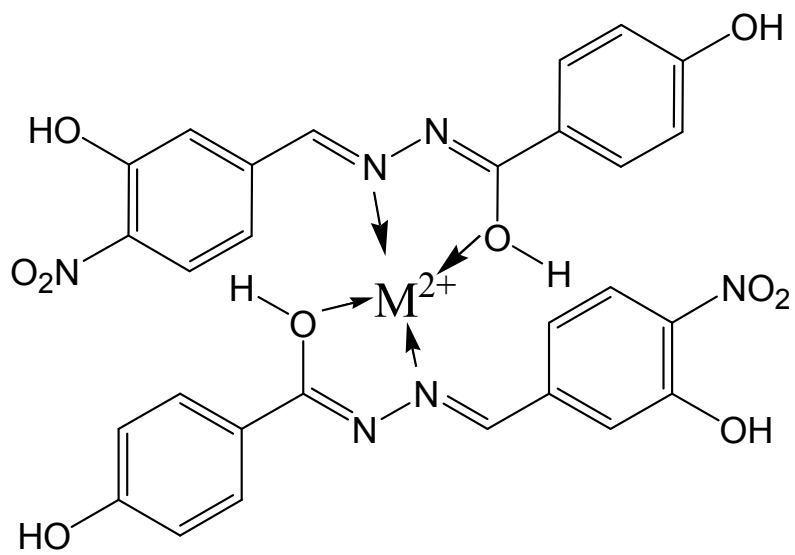

**Fig. S5** Proposed mode of complexation of 3-HNHBH ligand and metal ions

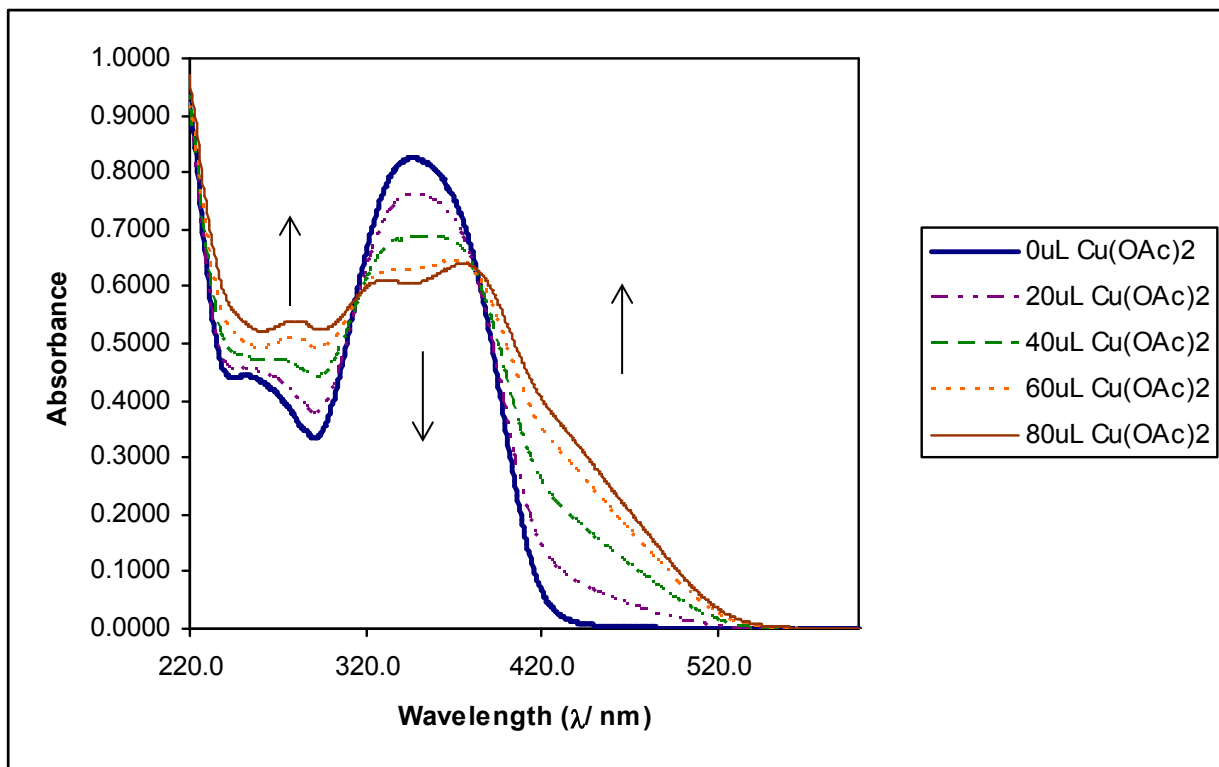

**Fig. S6** Absorbance vs wavelength ( $\lambda$ / nm) of ligand/THF with Cu(OAc)<sub>2</sub>/ACN. Some spectra omitted for clarity

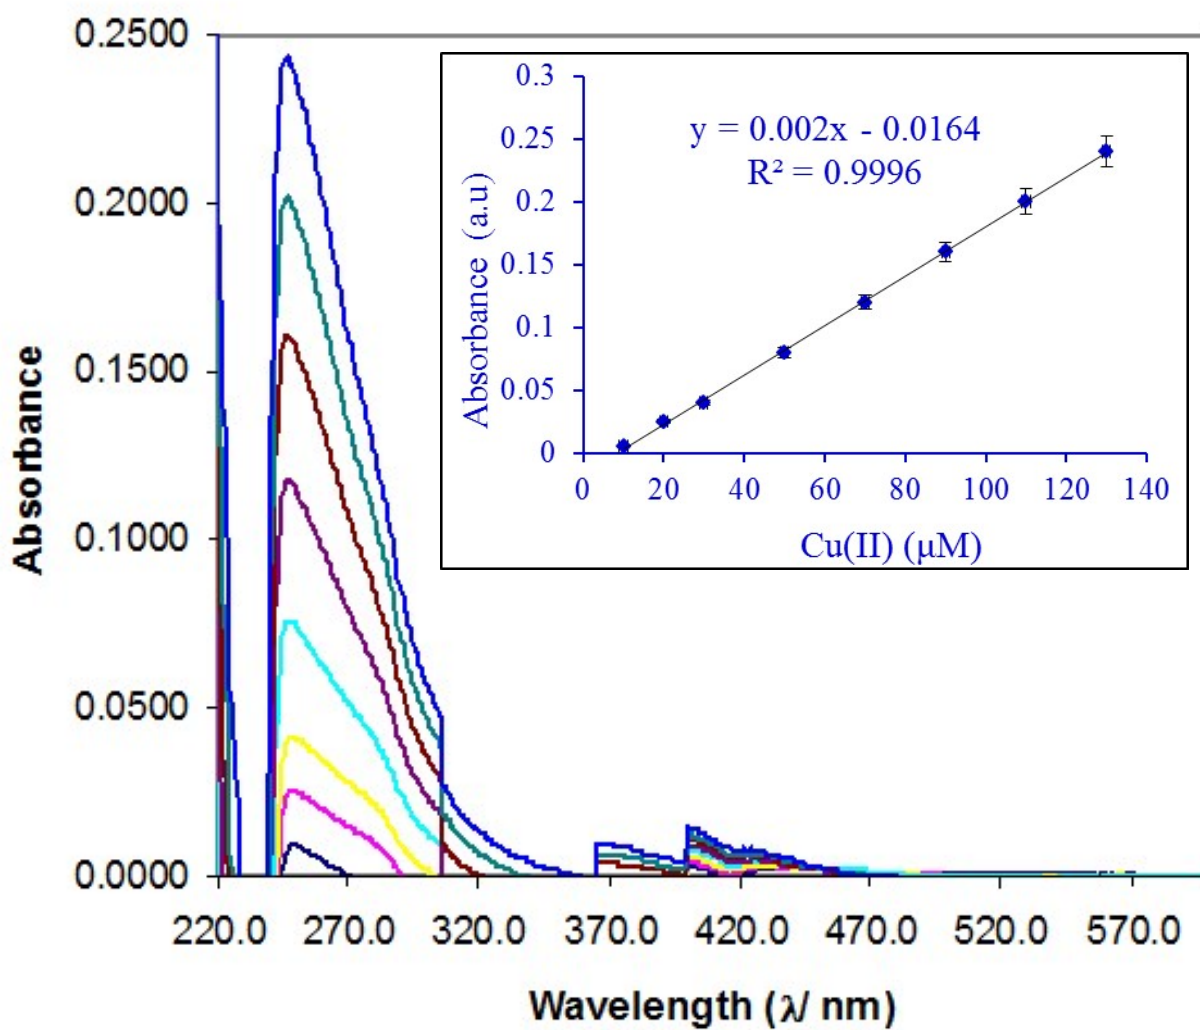

**Fig. S7** Absorbance vs wavelength ( $\lambda$ / nm) of ligand/THF with increasing concentrations of Cu(II) ions. Some spectra omitted for clarity. Inset: Calibration plot of absorbance vs concentration of Cu(II) ions



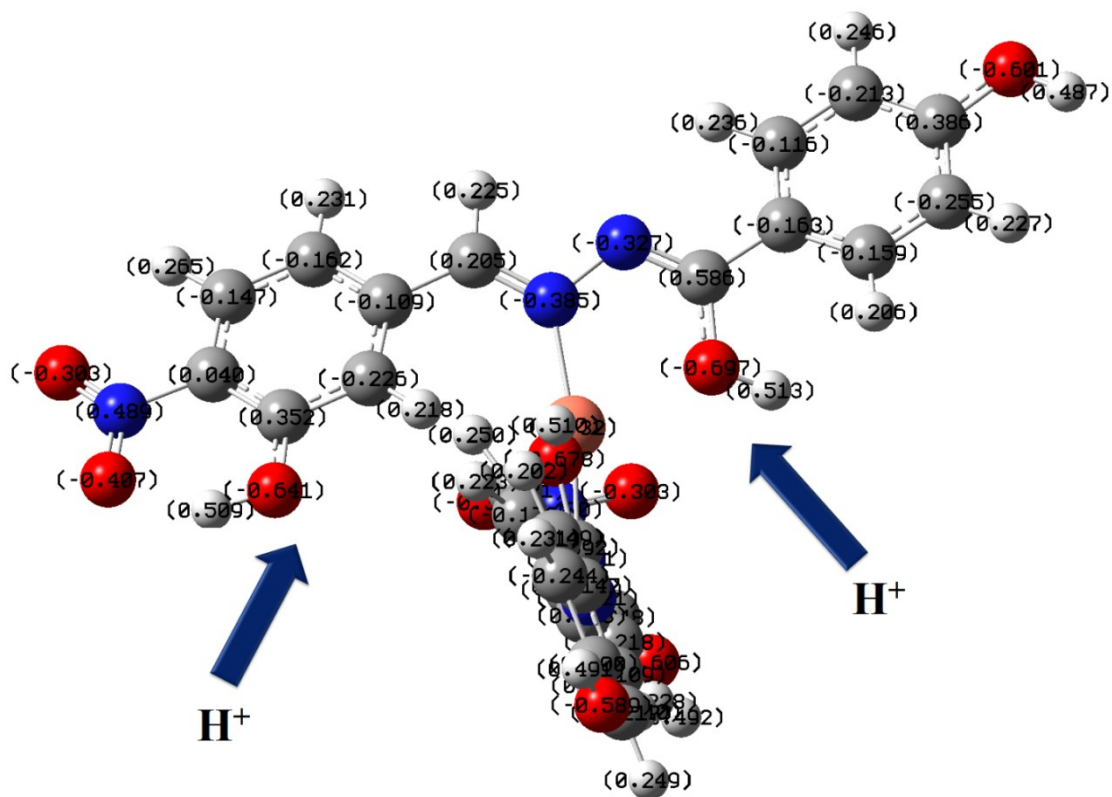

**Fig. S8** Mulliken atomic charges distribution of 3-HNHBH ligand complex with Cu(II) ion as calculated at the B3LYP/6-311+G\* level. The arrows indicate potential sites for possible proton attack

## List of Tables

**Table S1**  $^1\text{H}$  NMR assignment of 3-HNHBH ligand before and after complexation.

**Table S2** Color of ligand/THF solutions on addition of metal salts in THF or ACN.

**Table S3** Color change on addition of EDTA and HCl to 3-HNHBH ligand and metal salts in mixed aqueous solutions.

## Tables

**Table S1** <sup>1</sup>H NMR assignment of 3-HNHBH ligand before and after complexation

| Proton         | Ligand/DMSO-d <sub>6</sub> |                      | Ligand-Cu/DMSO-d <sub>6</sub> |                      |
|----------------|----------------------------|----------------------|-------------------------------|----------------------|
|                | Chemical shift<br>δ/ ppm   | Splitting<br>pattern | Chemical shift<br>δ/ ppm      | Splitting<br>pattern |
| H <sub>a</sub> | 11.17                      | Singlet              | 11.72                         | Singlet              |
| H <sub>b</sub> | 7.81                       | Doublet              | 9.40                          | Singlet              |
| H <sub>c</sub> | 6.87                       | Doublet              | 7.77                          | Singlet              |
| H <sub>d</sub> | 10.18                      | Singlet              | 12.64                         | Singlet              |
| H <sub>e</sub> | 8.38                       | Singlet              | 8.22                          | Singlet              |
| H <sub>f</sub> | 7.28                       | Doublet              | 6.84                          | Singlet              |
| H <sub>g</sub> | 7.96                       | Doublet              | 6.84                          | Singlet              |
| H <sub>h</sub> | 11.86                      | Singlet              | 11.72                         | Singlet              |
| H <sub>i</sub> | 7.49                       | Singlet              | 6.84                          | Singlet              |

**Table S2** Color of ligand/THF solutions on addition of metal salts in THF or ACN

| <b>Solvent</b>              |                                                                |                                                                |
|-----------------------------|----------------------------------------------------------------|----------------------------------------------------------------|
| <b>Solute</b>               | <b>THF</b>                                                     | <b>ACN</b>                                                     |
| <b>Zn(OAc)<sub>2</sub></b>  | <b>Solution remains pale greenish-yellow</b>                   | <b>Solution remains pale greenish-yellow</b>                   |
| <b>Cu(OAc)<sub>2</sub></b>  | <b>Solution turns slightly darker shade of greenish-yellow</b> | <b>Solution turns yellow (distinct, intense colour change)</b> |
| <b>Ni(acac)<sub>2</sub></b> | <b>Solution turns (pale) orange-yellow</b>                     | <b>Solution turns pale orangey-yellow</b>                      |

**Table S3** Color change on addition of EDTA and HCl to 3-HNHBH ligand and metal salts in mixed aqueous solutions

| <b>Concentration of EDTA / M</b>                                    | <b><math>2 \times 10^{-2}</math></b>  |                                  | <b><math>2 \times 10^{-4}</math></b>  |                                  | <b><math>2 \times 10^{-2}</math></b>  |                                  |
|---------------------------------------------------------------------|---------------------------------------|----------------------------------|---------------------------------------|----------------------------------|---------------------------------------|----------------------------------|
| <b>Vol. of EDTA or HCl added</b>                                    | <b>+1<math>\mu</math>L EDTA</b>       | <b>+1<math>\mu</math>L HCl</b>   | <b>+10<math>\mu</math>L EDTA</b>      | <b>+10<math>\mu</math>L HCl</b>  | <b>+1<math>\mu</math>L EDTA</b>       | <b>+1<math>\mu</math>L HCl</b>   |
| <b>Solvent composition<br/>Solute<br/>[Initial solution colour]</b> | <b>25% THF mixed aqueous solution</b> |                                  | <b>50% THF mixed aqueous solution</b> |                                  | <b>75% THF mixed aqueous solution</b> |                                  |
| <b>Ni(acac)<sub>2</sub></b>                                         | <b>Yellow</b>                         | <b>Solution turns colourless</b> | <b>Bright yellow</b>                  | <b>Solution turns colourless</b> | <b>Green-yellow</b>                   | <b>Solution turns colourless</b> |
| <b>Cu(OAc)<sub>2</sub></b>                                          | <b>Yellow</b>                         | <b>Solution turns colourless</b> | <b>Bright yellow</b>                  | <b>Solution turns colourless</b> | <b>Green-yellow</b>                   | <b>Solution turns colourless</b> |
| <b>Zn(OAc)<sub>2</sub></b>                                          | <b>Yellow</b>                         | <b>Solution turns colourless</b> | <b>Bright yellow</b>                  | <b>Solution turns colourless</b> | <b>Green-yellow</b>                   | <b>Solution turns colourless</b> |
